# Supplementary material for: Unnexin is a protein subunit of a large-pore channel expressed by unicellular organisms
Source: PubMed Central journal article supplement — Proc Natl Acad Sci U S A. 2023 Jul 24;120(31):e2307898120. doi: 10.1073/pnas.2307898120 (PMC10400985; doi:10.1073/pnas.2307898120), 2023-07-24
Supplement: pnas.2307898120.sapp.pdf [file pnas.2307898120.sapp.pdf]

## **Supporting Information for**

Unnexin is a protein subunit of a large-pore channel expressed by unicellular organisms.

Juan Güiza, Francisco Solis, Bernardita Valenzuela, Duxan Arancibia, Pedro Zamorano, Jorge González, Jonathan Saavedra, Alan Neely, Magdiel Salgado, Agustín D Martínez, Juan C. Sáez and José L. Vega

corresponding author: Juan Carlos Sáez and José L. Vega

Email: [juancarlos.saez@uv.cl](mailto:juancarlos.saez@uv.cl) or [jose Luis.vega@uantof.cl](mailto:jose Luis.vega@uantof.cl)

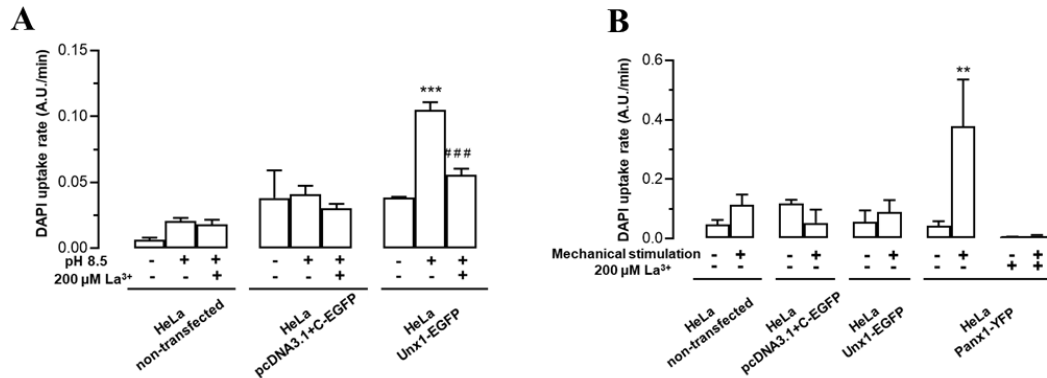

**Fig. S1. Alkaline pH but not mechanical stimulation increases the unnexin1 channel activity.** (A) DAPI uptake rate of Unx1-EGFP transfected HeLa cells (HeLa Unx1-EGFP cells) exposed to (A) an alkaline extracellular solution (pH 8.5) or (B) mechanical stimulation. During the last 5 min of each experiment, cells were treated with 200 μM lanthanum (La<sup>3+</sup>). Each value corresponds to the mean ± SEM, \*\**P* < 0.01, \*\*\**P* < 0.001 vs. basal. ### *P* < 0.001 vs pH 8.5 (n = 3 independent experiments in which a minimum of 20 cells were recorded).

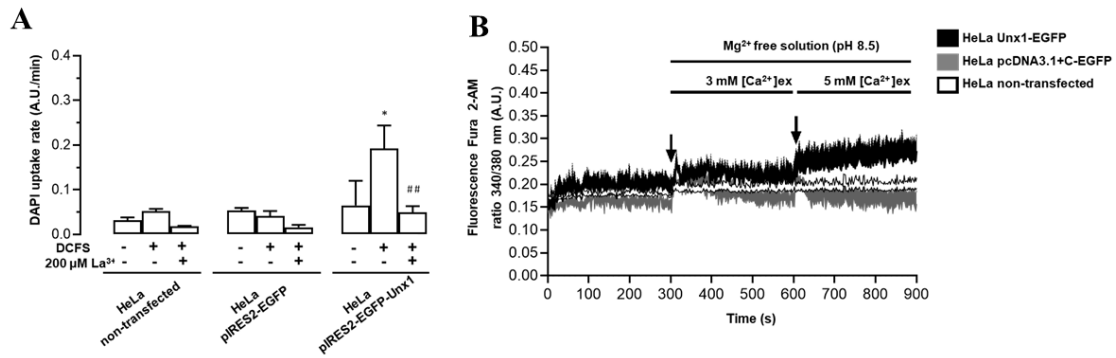

**Fig. S2. A low extracellular concentration of divalent cations increases unnexin1 channel activity but does not affect intracellular  $Ca^{2+}$  signals.** (A). HeLa parental cells or transfected with bicistronic EGFP and Unx1 (HeLa pIRES2-EGFP-Unx1) or transfected with the empty vector (HeLa pIRES2-EGFP) were used to evaluate the DAPI uptake upon exposure to an extracellular solution without  $Ca^{2+}$  and  $Mg^{2+}$  (divalent cation free solution: DCFS). (B) The absence of extracellular  $Mg^{2+}$  did not affect the Fura 2-AM signal in HeLa cells transfected with Unx1-EGFP. Data are presented as the mean  $\pm$  SEM; \* $P$ <0.05 vs. basal. ## $P$ <0.01 vs DCFS (n = 3).

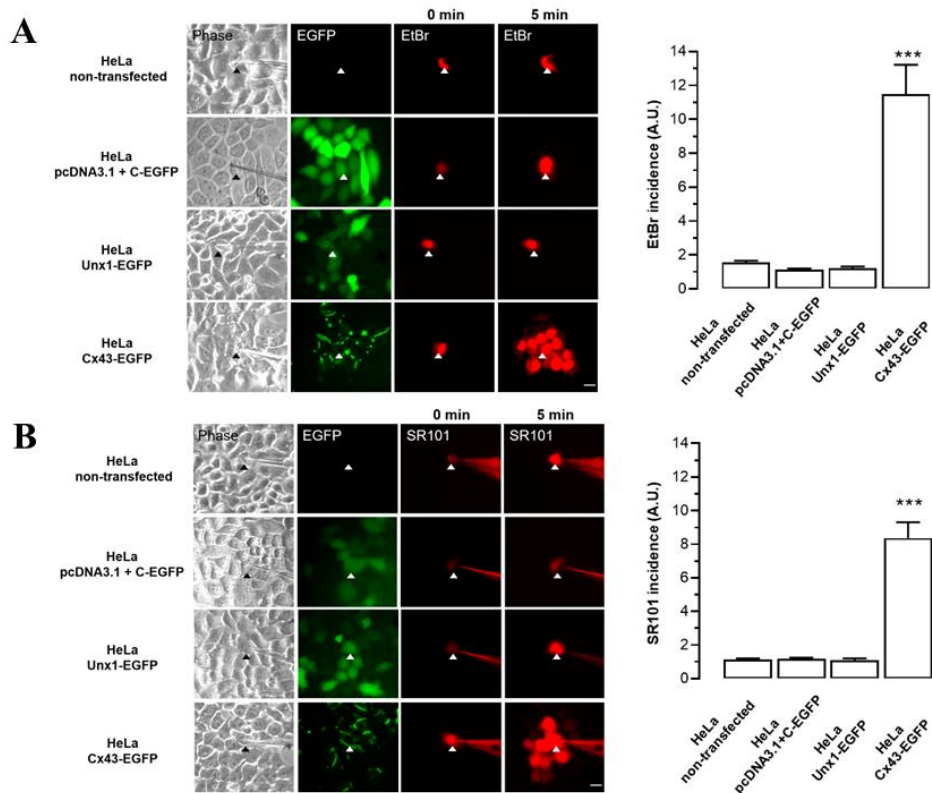

**Fig. S3. Unnexin1 does not form gap junction channels.** Dye coupling was assayed in monolayers of HeLa cells transfected with Unx1 (HeLa Unx1-EGFP cells). In each assay, one cell was microinjected with (A) ethidium bromide (EtBr) or (B) sulforhodamine 101 (SR101) in a total of 20 cells per experiment. HeLa Cx43-EGFP cells were used as a positive control. The arrowheads ( $\blacktriangle$ ) denote the injected cells. Scale bar = 25  $\mu$ m. Data are presented as the mean  $\pm$  SEM; \*\*\* $P$ <0.001 vs. non-injected ( $n = 3$ ).

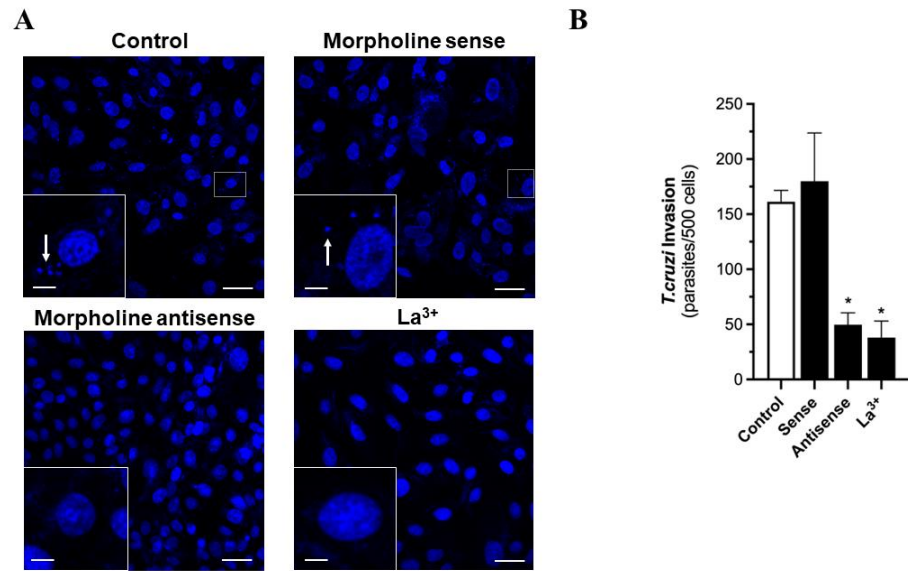

**Figure S4. Unnixin1 is required for *T. cruzi* invasion.** Representative confocal images of Vero cells with nucleus stained with DAPI. Cells were incubated overnight with Unx1 morpholinos. Vero cells were then incubated with *T. cruzi* trypomastigotes for 4 hours. Arrows in A top panels denote amastigotes, which were absent in the bottom panels. Scale bar = 50  $\mu$ m. Inset scale bar = 10  $\mu$ m (**B**) A graph showing the quantification of the number of parasites per 500 cells. Data are presented as the mean  $\pm$  SEM; \* $P$ <0.05 vs. control. n=3.

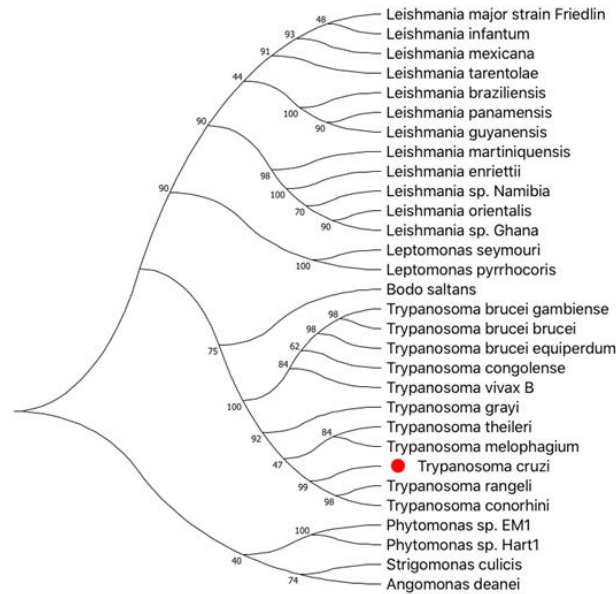

**Fig. S5. Phylogenetic tree of putative unnexin sequences.** Whole amino acid sequences of putative Unx1 orthologs from 30 protozoan taxa were used for the phylogenetic analysis. The analysis was performed using the neighbor-joining method and Jones–Taylor–Thornton (JTT) model. Numbers at the nodes indicate bootstrap percentages from 500 replicates. The red circle indicates Unx1 from *T. cruzi*, which was functionally characterized in this study and used to retrieve sequences from the NCBI proteindatabase via BLASTP.
